# Supplementary material
Source: HighWire-hosted journal article supplement (http://jpet.aspetjournals.org/highwire/filestream/135681/field_highwire_adjunct_files/0/Supplemental_Table_1.pdf)
Supplement: Supplemental_Table_1.pdf [file Supplemental_Table_1.pdf]

**Supplemental Data; Table 1.** Expanded binding selectivity profile for WAY-163909

Data are percent inhibition average of 2 determinations with 100 nM WAY-163909

| <b>NEUTRANSMITTER RELATED</b>           |     |
|-----------------------------------------|-----|
| Adenosine Transporter                   | 18  |
| A1 Adenosine                            | 20  |
| A2 Adenosine                            | 8   |
| ? 1A Adrenergic                         | 20  |
| ? 1B Adrenergic                         | 6   |
| ? 2A Adrenergic                         | 6   |
| ? 2B Adrenergic                         | -11 |
| ? 2C Adrenergic                         | 9   |
| ? 1 Adrenergic                          | 3   |
| ? 2 Adrenergic                          | 15  |
| Peripheral benzodiazepine               | 7   |
| Dopamine Transporter                    | -6  |
| D1 Dopamine                             | 5   |
| GABA <sub>A</sub> , agonist site        | 8   |
| GABA <sub>A</sub> , benzodiazepine site | -18 |
| GABA <sub>B</sub>                       | 18  |
| Glutamate, AMPA site                    | -2  |
| Glutamate, kainate site                 | -13 |
| Glutamate, NMDA agonist site            | 0   |
| Glutamate, NMDA glycine site            | 3   |
| Glycine, strychnine-sensitive           | -6  |
| H1 histamine                            | 15  |
| H2 histamine                            | 14  |
| H3 histamine                            | 18  |
| I2 imidazole, central                   | -3  |
| Melatonin                               | 3   |
| M1 muscarinic                           | 2   |
| M2 muscarinic                           | 14  |
| M3 muscarinic                           | -5  |
| M4 muscarinic                           | -1  |
| M5 muscarinic                           | 5   |
| Nicotinic, a-bungarotoxin site          | -7  |
| Norepinephrine Transporter              | 7   |
| Opiate, delta 1                         | 7   |
| Opiate, kappa                           | -16 |
| Opiate, mu                              | 7   |
| P2Y purinergic                          | 14  |
| 5-HT <sub>1B</sub>                      | 10  |
| 5-HT <sub>1D</sub>                      | 6   |
| 5-HT <sub>3</sub>                       | -9  |

|                                              |     |
|----------------------------------------------|-----|
| 5-HT <sub>4</sub>                            | 21  |
| Sigma 1                                      | 11  |
| Sigma 2                                      | -5  |
| <b>ION CHANNELS</b>                          |     |
| L-Type Calcium Channel, benzothiazepine site | 8   |
| L-Type Calcium Channel, dihydropyridine site | -18 |
| N-type Calcium Channel                       | 7   |
| GABA, chloride TBOB site                     | -14 |
| Glutamate, chloride-dependent site           | 23  |
| Glutamate, MK-801 site                       | 2   |
| Glutamate, NMDA PCP site                     | -7  |
| Potassium Channel, ATP-sensitive             | 4   |
| Potassium Channel, calcium-activated, VI     | 9   |
| Potassium Channel, calcium-activated, VS     | 8   |
| Sodium Channel, site 1                       | 17  |
| Sodium Channel, site 2                       | 0   |
| <b>TRANSPORT</b>                             |     |
| Choline Transport                            | 9   |
| GABA Transport                               | -6  |
| Glutamate Transport                          | 4   |
| <b>BRAIN/GUT PEPTIDES</b>                    |     |
| AT1 Angiotensin II                           | 10  |
| AT2 Angiotensin II                           | 8   |
| CCK1, CCK-A                                  | 8   |
| CCK2, CCK-B                                  | 5   |
| Galanin                                      | 1   |
| Neuropeptide Y, non-selective                | 0   |
| Neurotensin                                  | 2   |
| Somatostatin, non-selective                  | 18  |
| VIP, PACAP SV1                               | 13  |
| VIP, non-selective                           | -23 |
| Vasopressin 1                                | -1  |
|                                              |     |
